# Supplementary material for: Assessment of a Deep Learning Model to Predict Hepatocellular Carcinoma in Patients With Hepatitis C Cirrhosis
Source: PubMed Central journal article supplement (PMC7489819; doi:10.1001/jamanetworkopen.2020.15626), 2020-09-01
Supplement: jamanetwopen-e2015626-s001.pdf [file jamanetwopen-e2015626-s001.pdf]

## Supplementary Online Content

Ioannou GN, Tang W, Beste LA, et al. Assessment of a deep learning model to predict hepatocellular carcinoma in patients with hepatitis C cirrhosis. *JAMA Netw Open*. 2020;3(9):e2015626. doi:10.1001/jamanetworkopen.2020.15626

**eTable 1.** ICD-10 and ICD-9 Codes for Cirrhosis, Decompensated Cirrhosis, and HCC

**eTable 2.** Feature Selection Frequency Over 10 Splits for the Longitudinal LR With Lasso Penalty

**eTable 3.** Comparison of the Performance Characteristics of 3 Different Models Predicting the Development of HCC Within 3 years in Male Patients with HCV-Related Cirrhosis

This supplementary material has been provided by the authors to give readers additional information about their work.

**eTable 1. ICD-10 and ICD-9 Codes for Cirrhosis, Decompensated Cirrhosis, and HCC**

| Diagnosis                                                                        | ICD9   |                                                              | ICD10   |
|----------------------------------------------------------------------------------|--------|--------------------------------------------------------------|---------|
| <b>HEPATOCELLULAR CARCINOMA</b>                                                  | 155.0  | <b>HEPATOCELLULAR CARCINOMA</b>                              | C22.0   |
| <b>CIRRHOSIS</b>                                                                 |        |                                                              |         |
| Alcoholic Cirrhosis Of Liver                                                     | 571.2  | Alcoholic cirrhosis without ascites                          | K70.30  |
| Cirrhosis Of Liver Without Mention Of Alcohol                                    | 571.5  | Other cirrhosis of liver                                     | K74.69  |
|                                                                                  |        | Unspecified cirrhosis of the liver                           | K74.60  |
|                                                                                  |        | Pigmentary cirrhosis of the liver                            | E83.110 |
|                                                                                  |        | Cirrhosis (of liver) with toxic liver disease                | K71.7   |
| <b>DECOMPENSATED CIRRHOSIS (INCLUDES ANY OF THE FOLLOWING)</b>                   |        |                                                              |         |
| <b>VARICES NO BLEEDING</b>                                                       |        |                                                              |         |
| Esophageal Varices Without Mention Of Bleeding                                   | 456.1  | Esophageal varices, no bleeding                              | I85.00  |
| Esophageal Varices In Diseases Classified Elsewhere, Without Mention Of Bleeding | 456.21 | Gastric Varices, no bleeding                                 | I86.40  |
|                                                                                  |        | Secondary esophageal varices, no bleeding                    | I85.10  |
| <b>VARICES WITH BLEEDING</b>                                                     |        |                                                              |         |
| Esophageal Varices With Bleeding                                                 | 456.0  | Esophageal varices, with bleeding                            | I85.01  |
| Esophageal Varices In Diseases Classified Elsewhere, With Bleeding               | 456.20 | Gastric Varices, with bleeding                               | I86.41  |
|                                                                                  |        | Secondary esophageal varices, with bleeding                  | I85.11  |
| <b>ASCITES</b>                                                                   |        |                                                              |         |
| Ascites                                                                          | 789.5  | Alcoholic cirrhosis with ascites                             | K70.31  |
| Other ascites                                                                    | 789.60 | Ascites in alcoholic hepatitis                               | K70.11  |
| Non-malignant ascites                                                            | 789.59 | Ascites in toxic liver disease with chronic active hepatitis | K71.51  |
|                                                                                  |        | Other ascites                                                | R18.8   |
| <b>SPONTANEOUS BACTERIAL PERITONITIS</b>                                         | 567.23 |                                                              | K65.2   |
| <b>ENCEPHALOPATHY*</b>                                                           |        |                                                              |         |
| Encephalopathy                                                                   | 572.2  | Hepatic failure, unspecified with coma                       | K72.91  |
| Chronic hepatitis C with hepatic coma                                            |        | Encephalopathy, unspecified                                  | G93.40  |
|                                                                                  |        | Chronic failure with coma                                    | K72.11  |
| <b>HEPATORENAL SYNDROME</b>                                                      | 572.5  |                                                              | K76.7   |
| <b>HEPATOPULMONARY SYNDROME</b>                                                  | 573.5  |                                                              | K76.81  |

**eTable 2. Feature Selection Frequency Over 10 Splits for the Longitudinal LR With Lasso Penalty<sup>1</sup>**

| Feature                  | Selection frequency | Feature                        | Selection frequency | Feature                          | Selection frequency |
|--------------------------|---------------------|--------------------------------|---------------------|----------------------------------|---------------------|
| genotype_main_>=4        | 10                  | alkalinephosphatase_max        | 10                  | hemoglobin_maxdiff               | 9                   |
| alt_maxdiff              | 10                  | alkalinephosphatase_min        | 10                  | totprotein_max                   | 9                   |
| potassium_tv             | 10                  | alkalinephosphatase_min diff   | 10                  | ASTALT_min                       | 9                   |
| glucose_max              | 10                  | alkalinephosphatase_max diff   | 10                  | albumin_tv                       | 9                   |
| glucose_min              | 10                  | APRI_min                       | 10                  | alkalinephosphataseratio_min     | 9                   |
| glucose_tv               | 10                  | APRI_tv                        | 10                  | wbc_tv                           | 9                   |
| plt_max                  | 10                  | hemoglobin_tv                  | 10                  | alphafetoprotein_mindiff         | 9                   |
| plt_min                  | 10                  | sodium_max                     | 10                  | Fib4_min                         | 9                   |
| plt_mindiff              | 10                  | BMI_tv                         | 10                  | alphafetoproteinratio_min        | 9                   |
| alt_max                  | 10                  | inr_mindiff                    | 10                  | bilirubin_max                    | 9                   |
| alt_mindiff              | 10                  | Race_HISPANIC                  | 10                  | Race_WHITE                       | 9                   |
| alphafetoprotein_max     | 10                  | bilirubin_mindiff              | 10                  | glucose_mindiff                  | 8                   |
| potassium_mindiff        | 10                  | Race_BLACK OR AFRICAN AMERICAN | 10                  | glucose_maxdiff                  | 8                   |
| alphafetoprotein_maxdiff | 10                  | inr_max                        | 10                  | Fib4_mindiff                     | 8                   |
| genotype_main_3          | 10                  | AgeAtCirrhosis                 | 10                  | APRI_max                         | 8                   |
| bloodureanitro_max       | 10                  | inr_min                        | 10                  | totprotein_maxdiff               | 8                   |
| bloodureanitro_min       | 10                  | SVR                            | 10                  | Fib4_maxdiff                     | 8                   |
| bloodureanitro_mindiff   | 10                  | BMI_maxdiff                    | 10                  | inr_maxdiff                      | 8                   |
| bloodureanitro_maxdiff   | 10                  | albumin_maxdiff                | 10                  | alkalinephosphataseratio_max     | 8                   |
| hemoglobin_max           | 10                  | albumin_min                    | 10                  | alphafetoproteinratio_maxdiff    | 8                   |
| hemoglobin_min           | 10                  | albumin_max                    | 10                  | alkalinephosphatase_tv           | 7                   |
| hemoglobin_mindiff       | 10                  | alratio_min                    | 10                  | APRI_mindiff                     | 7                   |
| potassium_maxdiff        | 10                  | wbc_min                        | 10                  | Fib4_tv                          | 7                   |
| potassium_min            | 10                  | wbc_maxdiff                    | 10                  | wbc_mindiff                      | 7                   |
| ASTALT_tv                | 10                  | Race_OTHER                     | 10                  | alkalinephosphataseratio_maxdiff | 7                   |
| chloride_mindiff         | 10                  | bilirubin_tv                   | 10                  | alt_min                          | 7                   |
| sodium_min               | 10                  | genotype_main_2                | 10                  | ast_mindiff                      | 7                   |
| sodium_mindiff           | 10                  | Gender_M                       | 10                  | plt_tv                           | 6                   |
| sodium_maxdiff           | 10                  | BMI_min                        | 10                  | alphafetoprotein_min             | 6                   |
| sodium_tv                | 10                  | ast_min                        | 10                  | bilirubin_min                    | 6                   |
| Fib4_max                 | 10                  | BMI_max                        | 10                  | astratio_maxdiff                 | 6                   |
| creatinine_max           | 10                  | ast_tv                         | 10                  | BMI_mindiff                      | 6                   |
| creatinine_min           | 10                  | genotype_main_1                | 10                  | creatinine_tv                    | 6                   |
| chloride_max             | 10                  | ast_maxdiff                    | 10                  | inr_tv                           | 6                   |
| chloride_min             | 10                  | ast_max                        | 10                  | ASTALT_max                       | 6                   |
| chloride_maxdiff         | 10                  | Gender_F                       | 10                  | alratio_max                      | 6                   |
| potassium_max            | 10                  | totprotein_mindiff             | 10                  |                                  |                     |
| totprotein_min           | 10                  | totprotein_tv                  | 10                  |                                  |                     |

<sup>1</sup>For two logistic regression models with feature selection, 36 out of the original 37 features were selected for the cross-sectional-LR and 112 out of the original 137 features were selected for the longitudinal-LR. The prediction performance

of two logistic regression models with lasso penalty is very close to that of models without lasso penalty - the average AUROC, AUPRC and Brier score of the longitudinal-LR were 0.689, 0.353 and 0.149; those of the cross-sectional-LR were 0.682, 0.344 and 0.150. The RNN model achieved better prediction performance than two logistic regression models either with feature selection or without feature selection.

**eTable 3. Comparison of the Performance Characteristics of 3 Different Models Predicting the Development of HCC Within 3 years in Male Patients with HCV-Related Cirrhosis**

| MALE PATIENTS                                               | Cross-sectional<br>LR Model | Longitudinal<br>LR Model | RNN<br>Model | P-value<br>compared<br>to RNN model |
|-------------------------------------------------------------|-----------------------------|--------------------------|--------------|-------------------------------------|
| AUROC                                                       | 0.681±0.008                 | 0.688±0.010              | 0.757±0.009  | <0.0001                             |
| Brier score                                                 | 0.151±0.003                 | 0.150±0.003              | 0.137±0.003  | <0.0001                             |
| AUPRC                                                       | 0.346±0.011                 | 0.362±0.009              | 0.481±0.019  | <0.0001                             |
| Proportion of patients who test positive at 90% sensitivity | 0.749±0.007                 | 0.739±0.013              | 0.667±0.012  | <0.0001                             |
| Specificity at 90% sensitivity                              | 0.289±0.009                 | 0.302±0.016              | 0.392±0.014  | <0.0001                             |
| Positive predictive value at 90% sensitivity                | 0.244±0.006                 | 0.248±0.007              | 0.274±0.005  | <0.0001                             |
| Negative predictive value at 90% sensitivity                | 0.918±0.003                 | 0.921±0.004              | 0.938±0.003  | <0.0001                             |
| Proportion of patients who test positive at 80% sensitivity | 0.602±0.012                 | 0.594±0.017              | 0.515±0.016  | <0.0001                             |
| Specificity at 80% sensitivity                              | 0.447±0.015                 | 0.458±0.021              | 0.558±0.019  | <0.0001                             |
| Positive predictive value at 80% sensitivity                | 0.270±0.007                 | 0.274±0.009              | 0.3165±0.010 | <0.0001                             |
| Negative predictive value at 80% sensitivity                | 0.897±0.005                 | 0.899±0.005              | 0.916±0.004  | <0.0001                             |
